# Supplementary material for: Exploration of the Crystal Structure and Thermal and Spectroscopic Properties of Monoclinic Praseodymium Sulfate Pr2(SO4)3
Source: MDPI journal article supplement (doi:10.3390/molecules27133966), 2022-06-21
Supplement: s1 [file s1]

## Supporting materials

### Exploration of the Crystal Structure and Thermal and Spectroscopic Properties of Monoclinic Praseodymium Sulfate $\text{Pr}_2(\text{SO}_4)_3$

Yuriy G. Denisenko<sup>1,2,3</sup>, Victor V. Atuchin<sup>4,5,6,7,8,\*</sup>, Maxim S. Molokeyev<sup>9,10,11</sup>, Alexander E. Sedykh<sup>3</sup>, Nikolay A. Khritokhin<sup>1</sup>, Aleksandr S. Aleksandrovsky<sup>12,13</sup>, Aleksandr S. Oreshonkov<sup>14,15</sup>, Nikolai P. Shestakov<sup>14</sup>, Sergey V. Adichtchev<sup>16</sup>, Alexey M. Pugachev<sup>16</sup>, Elena I. Sal'nikova<sup>1,17</sup>, Oleg V. Andreev<sup>1</sup>, Illaria A. Razumkova<sup>1</sup> and Klaus Müller-Buschbaum<sup>3,18</sup>

<sup>1</sup>Department of Inorganic and Physical Chemistry, Tyumen State University, 625003 Tyumen, Russia; yu.g.denisenko@gmail.com (Y.G.D.); kna@utmn.ru (N.A.K.); elenasalnikova213@gmail.com (E.I.S.); o.v.andreev@utmn.ru (O.V.A.); razumkova@list.ru (I.A.R.)

<sup>2</sup>Department of General and Special Chemistry, Industrial University of Tyumen, 625000 Tyumen, Russia

<sup>3</sup>Institute of Inorganic and Analytical Chemistry, Justus-Liebig-University Giessen, 35392 Giessen, Germany; al-exander.sedykh@anorg.chemie.uni-giessen.de (A.E.S.); klaus.mueller-buschbaum@anorg.chemie.uni-giessen.de (K.M.-B.)

<sup>4</sup>Laboratory of Optical Materials and Structures, Institute of Semiconductor Physics, SB RAS, 630090 Novosibirsk, Russia

<sup>5</sup>Research and Development Department, Kemerovo State University, 650000 Kemerovo, Russia

<sup>6</sup>Department of Applied Physics, Novosibirsk State University, 630090 Novosibirsk, Russia

<sup>7</sup>Department of Industrial Machinery Design, Novosibirsk State Technical University, 630073 Novosibirsk, Russia

<sup>8</sup>R&D Center “Advanced Electronic Technologies”, Tomsk State University, Tomsk 634034, Russia

<sup>9</sup>Laboratory of Crystal Physics, Kirensky Institute of Physics, Federal Research Center KSC SB  
RAS, 660036 Krasnoyarsk, Russia; msmolokeev@mail.ru

<sup>10</sup>School of Engineering Physics and Radio Electronics, Siberian Federal University, 660041  
Krasnoyarsk, Russia

<sup>11</sup>Department of Physics, Far Eastern State Transport University, 680021 Khabarovsk, Russia

<sup>12</sup>Laboratory of Coherent Optics, Kirensky Institute of Physics Federal Research Center KSC SB  
RAS, 660036 Krasnoyarsk, Russia; aleksandrovsky@kirensky.ru

<sup>13</sup>Institute of Nanotechnology, Spectroscopy and Quantum Chemistry, Siberian Federal University,  
660041 Krasnoyarsk, Russia

<sup>14</sup>Laboratory of Molecular Spectroscopy, Kirensky Institute of Physics Federal Research Center  
KSC SB RAS, 660036 Krasnoyarsk, Russia; oreshonkov@iph.krasn.ru (A.S.O.); nico@iph.krasn.ru  
(N.P.S.)

<sup>15</sup>School of Engineering and Construction, Siberian Federal University, 660041 Krasnoyarsk,  
Russia

<sup>16</sup>Institute of Automation and Electrometry, Russian Academy of Sciences, 630090 Novosibirsk,  
Russia; adish2@ngs.ru (S.V.A.); apg@iae.nsk.su (A.M.P.)

<sup>17</sup>Research Department, Northern Trans-Ural Agricultural University, 625003 Tyumen, Russia

<sup>18</sup>Center for Materials Research (LaMa), Justus-Liebig-University Giessen, 35392 Giessen,  
Germany

\*Correspondence: atuchin@isp.nsc.ru

**Table S1.** Fractional atomic coordinates and isotropic displacement parameters ( $\text{\AA}^2$ ) in  $\text{Pr}_2(\text{SO}_4)_3$ 

|    | $x$          | $y$          | $z$          | $B_{\text{iso}}$ |
|----|--------------|--------------|--------------|------------------|
| Pr | 0.13171 (3)  | 0.65109 (12) | 0.12749 (11) | 0.74 (5)         |
| S1 | 0.18297 (15) | 0.1864 (4)   | 0.1763 (5)   | 0.60 (8)         |
| S2 | 0            | 0.6621 (8)   | 1/4          | 1.10 (11)        |
| O1 | 0.1471 (3)   | -0.0031 (8)  | 0.1270 (11)  | 0.51 (8)         |
| O2 | 0.1513 (3)   | 0.3167 (11)  | 0.3022 (10)  | 0.51 (8)         |
| O3 | 0.2523 (3)   | 0.1488 (11)  | 0.2861 (8)   | 0.51 (8)         |
| O4 | 0.1755 (3)   | 0.3038 (12)  | -0.0083 (9)  | 0.51 (8)         |
| O5 | 0.0554 (3)   | 0.5410 (10)  | 0.3544 (9)   | 0.51 (8)         |
| O6 | 0.0229 (3)   | 0.7783 (9)   | 0.1120 (8)   | 0.51 (8)         |

**Table S2.** Main bond lengths ( $\text{\AA}$ ) in  $\text{Pr}_2(\text{SO}_4)_3$ 

|                      |           |       |           |
|----------------------|-----------|-------|-----------|
| Pr—O1 <sup>i</sup>   | 2.349 (6) | S1—O1 | 1.476 (6) |
| Pr—O2                | 2.530 (7) | S1—O2 | 1.542 (7) |
| Pr—O2 <sup>ii</sup>  | 2.443 (6) | S1—O3 | 1.479 (5) |
| Pr—O3 <sup>iii</sup> | 2.391 (4) | S1—O4 | 1.477 (7) |
| Pr—O4 <sup>iv</sup>  | 2.443 (6) | S2—O5 | 1.446 (6) |
| Pr—O5 <sup>ii</sup>  | 2.466 (6) | S2—O6 | 1.441 (6) |
| Pr—O6                | 2.473 (4) |       |           |

Symmetry codes for: (i)  $x, y+1, z$ ; (ii)  $x, -y+1, z-1/2$ ; (iii)  $-x+1/2, y+1/2, -z+1/2$ ; (iv)  $x, -y+1, z+1/2$ ; (v)  $-x, y, -z+1/2$ .

**Table S3.** Main parameters of processing and refinement of the  $\text{Pr}_2(\text{SO}_4)_3$  sample at  $T = 30\text{-}270\text{ }^\circ\text{C}$ 

| T, $^\circ\text{C}$ | Space group | Cell parameters ( $^\circ$ , $\text{\AA}$ ),<br>Cell volume ( $\text{\AA}^3$ )                             | $R_{wp}$ , $R_p(\%)$ , $\chi^2$ |
|---------------------|-------------|------------------------------------------------------------------------------------------------------------|---------------------------------|
| 30                  | $C2/c$      | $a = 21.5713$ (7),<br>$b = 6.7161$ (2),<br>$c = 6.9634$ (4),<br>$\beta = 107.687$ (2),<br>$V = 961.13$ (5) | 5.83, 4.49,<br>1.08             |
| 60                  | $C2/c$      | $a = 21.5724$ (8),<br>$b = 6.7161$ (3),<br>$c = 6.9645$ (3),<br>$\beta = 107.698$ (2),<br>$V = 961.28$ (7) | 5.78, 4.49,<br>1.07             |
| 90                  | $C2/c$      | $a = 21.5773$ (9),<br>$b = 6.7168$ (3),<br>$c = 6.9660$ (3),<br>$\beta = 107.712$ (2),<br>$V = 961.74$ (7) | 5.77, 4.48,<br>1.07             |
| 120                 | $C2/c$      | $a = 21.5815$ (7),<br>$b = 6.7179$ (2),<br>$c = 6.9681$ (2),<br>$\beta = 107.738$ (2),<br>$V = 962.22$ (5) | 5.81, 4.57,<br>1.08             |
| 150                 | $C2/c$      | $a = 21.5866$ (9),<br>$b = 6.7193$ (3),<br>$c = 6.9700$ (3),<br>$\beta = 107.778$ (2),<br>$V = 962.69$ (7) | 5.96, 4.62,<br>1.11             |
| 180                 | $C2/c$      | $a = 21.5985$ (6),<br>$b = 6.7215$ (2),<br>$c = 6.9764$ (2),<br>$\beta = 107.803$ (2),<br>$V = 964.29$ (5) | 5.81, 4.51,<br>1.06             |
| 210                 | $C2/c$      | $a = 21.6057$ (9),<br>$b = 6.7222$ (3),<br>$c = 6.9820$ (3),<br>$\beta = 107.870$ (2),<br>$V = 965.12$ (7) | 5.89, 4.57,<br>1.08             |
| 240                 | $C2/c$      | $a = 21.6134$ (7),<br>$b = 6.7242$ (2),<br>$c = 6.9853$ (2),<br>$\beta = 107.906$ (2),<br>$V = 966.02$ (6) | 5.89, 4.47,<br>1.08             |
| 270                 | $C2/c$      | $a = 21.6193$ (9),<br>$b = 6.7256$ (3),<br>$c = 6.9888$ (3),<br>$\beta = 107.935$ (2),<br>$V = 966.80$ (8) | 5.89, 4.57,<br>1.08             |

**Table S4.** Fractional atomic coordinates (Å) and occupancies of Pr<sub>2</sub>(SO<sub>4</sub>)<sub>3</sub>·8H<sub>2</sub>O

| Atom | <i>x</i>     | <i>y</i>    | <i>z</i>     | Occ. |
|------|--------------|-------------|--------------|------|
| Pr1  | 0.16914 (14) | 0.4763 (3)  | 0.39378 (13) | 1    |
| O1   | 0.3501 (12)  | 0.512 (3)   | 0.4574 (9)   | 1    |
| O2   | 0.0155 (16)  | 0.664 (3)   | 0.3590 (13)  | 1    |
| O3   | 0.0386 (15)  | 0.261 (3)   | 0.4350 (10)  | 1    |
| O4   | 0.2665 (10)  | 0.507 (4)   | 0.2943 (8)   | 1    |
| S1   | 0.2119 (6)   | 0.5258 (16) | 0.5884 (5)   | 1    |
| O5   | 0.1984 (14)  | 0.821 (3)   | 0.3976 (13)  | 1    |
| O6   | 0.1600 (13)  | 0.521 (4)   | 0.6445 (11)  | 1    |
| O7   | 0.1487 (13)  | 0.593 (3)   | 0.5226 (11)  | 1    |
| O8   | 0.2497 (14)  | 0.169 (3)   | 0.4250 (12)  | 1    |
| S2   | -0.0073 (14) | 0.1809 (11) | 0.2554 (11)  | 1    |
| O9   | 0.0849 (16)  | 0.315 (3)   | 0.2924 (12)  | 1    |
| O10  | -0.0370 (11) | 0.037 (3)   | 0.3116 (9)   | 1    |
| H1   | 0.3814       | 0.4312      | 0.4838       | 1    |
| H2   | 0.361        | 0.6166      | 0.4845       | 1    |
| H3   | -0.0434      | 0.6132      | 0.3549       | 1    |
| H4   | 0.0076       | 0.7843      | 0.3477       | 1    |
| H5   | 0.0064       | 0.1908      | 0.4028       | 1    |
| H6   | -0.0066      | 0.3184      | 0.4527       | 1    |
| H7   | 0.2369       | 0.4741      | 0.2524       | 1    |
| H8   | 0.3197       | 0.5429      | 0.3007       | 1    |

**Table S5.** Main bond lengths (Å) in Pr<sub>2</sub>(SO<sub>4</sub>)<sub>3</sub>·8H<sub>2</sub>O

|                     |            |                       |            |
|---------------------|------------|-----------------------|------------|
| Pr1—O1              | 2.509 (13) | Pr1—O9                | 2.26 (2)   |
| Pr1—O2              | 2.430 (17) | S1—O5 <sup>ii</sup>   | 1.594 (18) |
| Pr1—O3              | 2.561 (17) | S1—O6                 | 1.382 (18) |
| Pr1—O4              | 2.508 (13) | S1—O7                 | 1.40 (2)   |
| Pr1—O5              | 2.398 (19) | S1—O8 <sup>i</sup>    | 1.48 (2)   |
| Pr1—O7              | 2.583 (19) | S2—O9 <sup>iii</sup>  | 1.554 (19) |
| Pr1—O8 <sup>i</sup> | 3.43 (2)   | S2—O10 <sup>iii</sup> | 1.669 (18) |
| Pr1—O8              | 2.392 (19) |                       |            |

Symmetry codes: (i) -x+1/2, -y+1/2, -z+1; (ii) -x+1/2, -y+3/2, -z+1; (iii) -x, y, -z+1/2

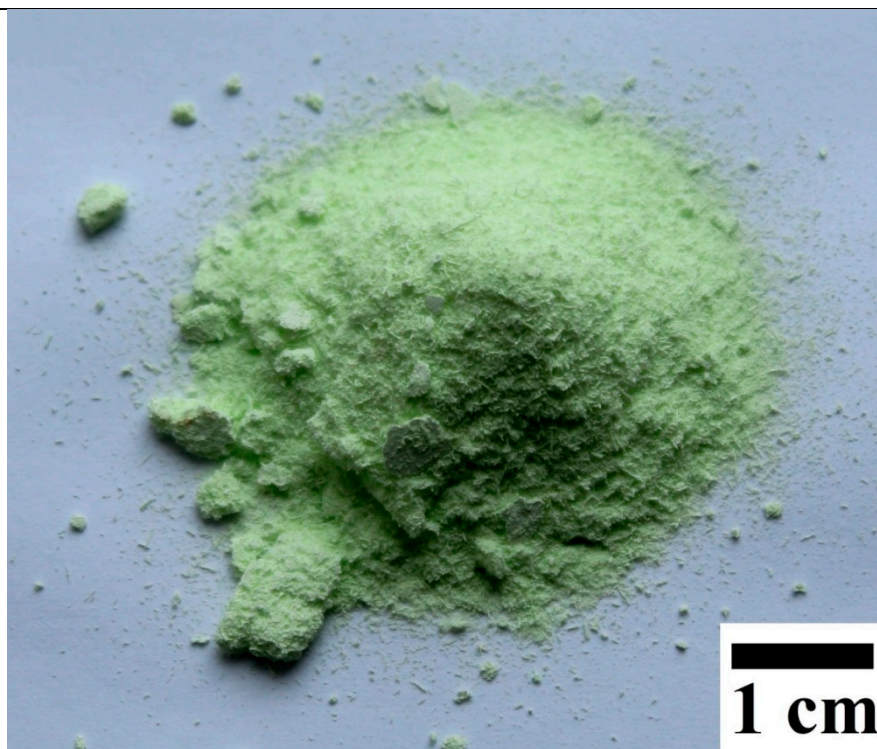

a

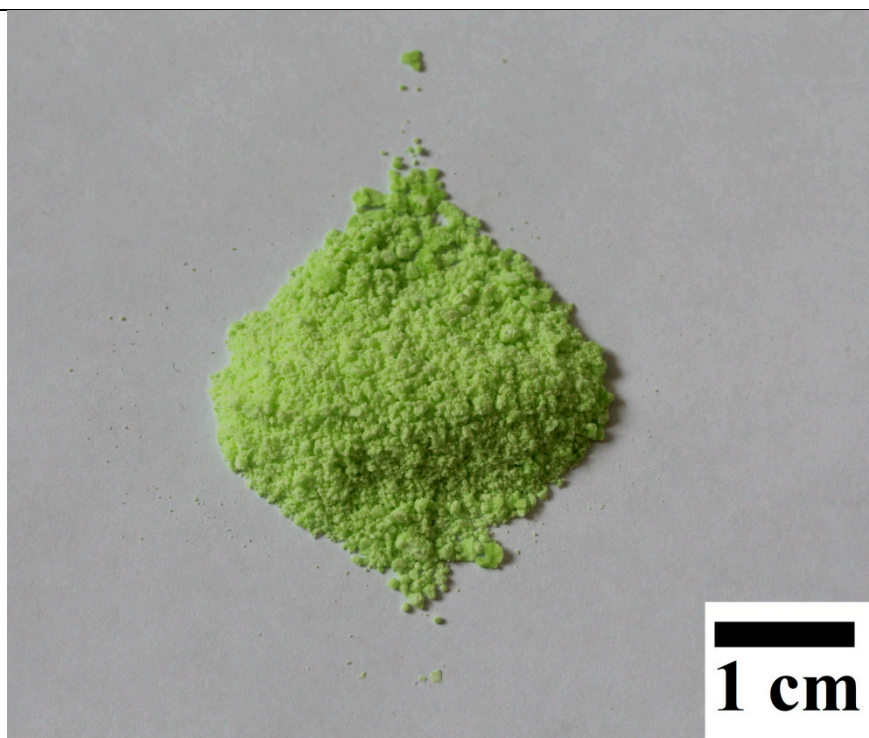

b

**Figure S1.** The digital image of (a)  $\text{Pr}_2(\text{SO}_4)_3$  and (b)  $\text{Pr}_2(\text{SO}_4)_3 \cdot 8\text{H}_2\text{O}$  powder under the Sun day illumination.

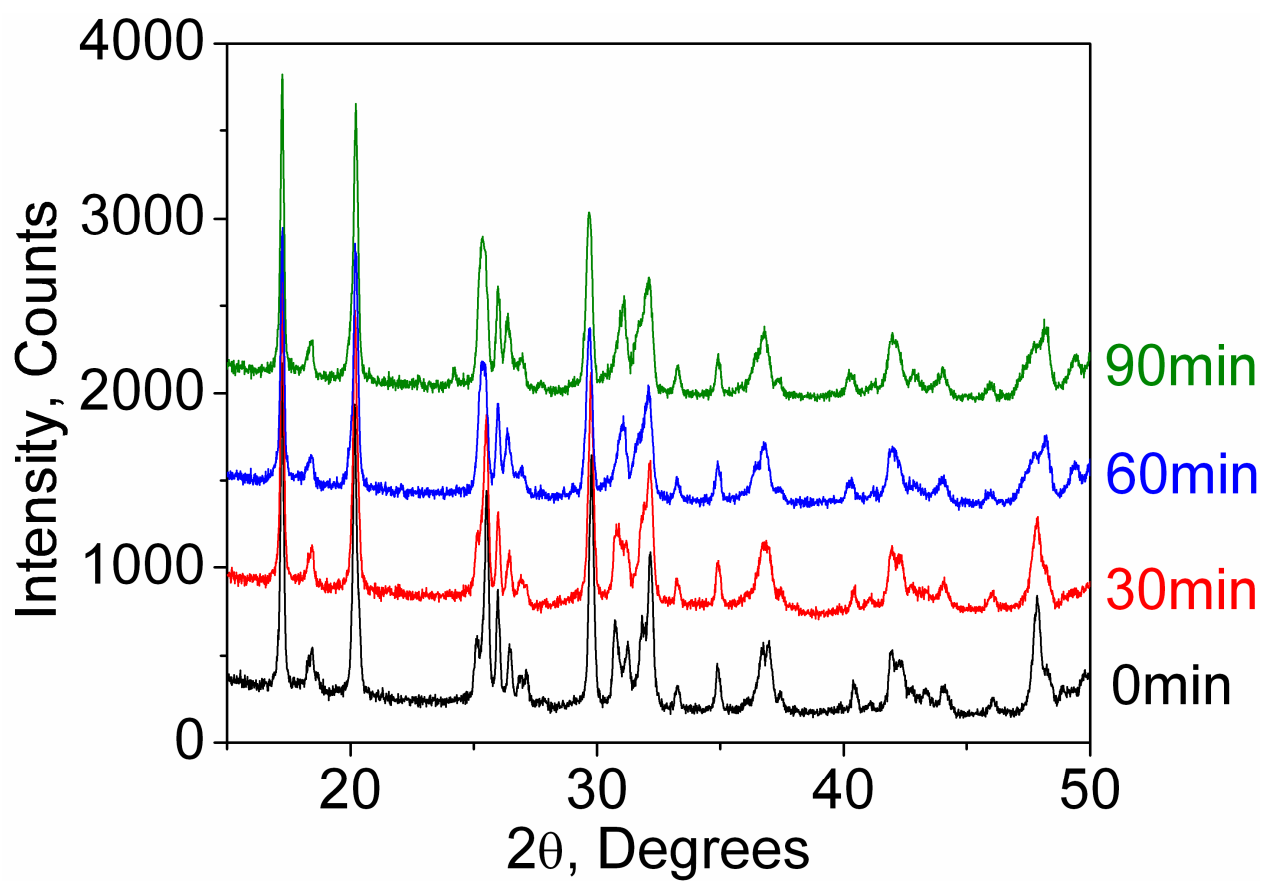

**Figure S2.** Four XRD patterns measured for the  $\text{Pr}_2(\text{SO}_4)_3$  sample with 30 min intervals on keeping in the laboratory air at ambient conditions.

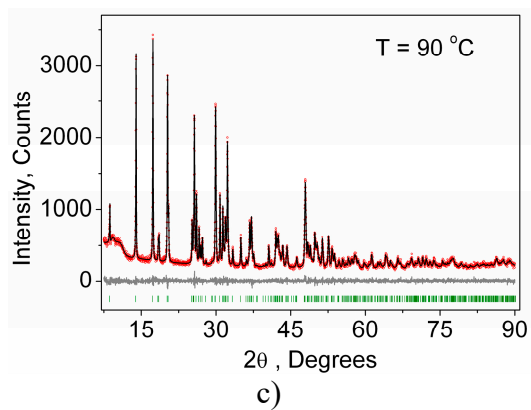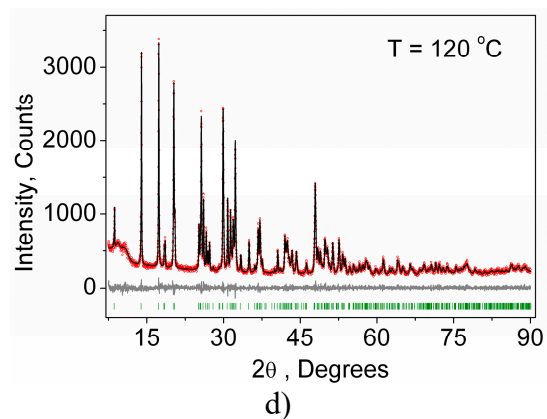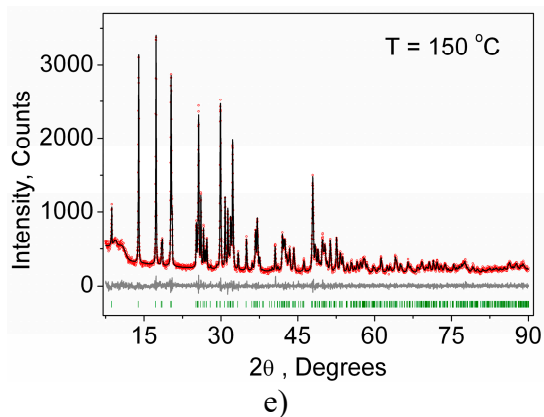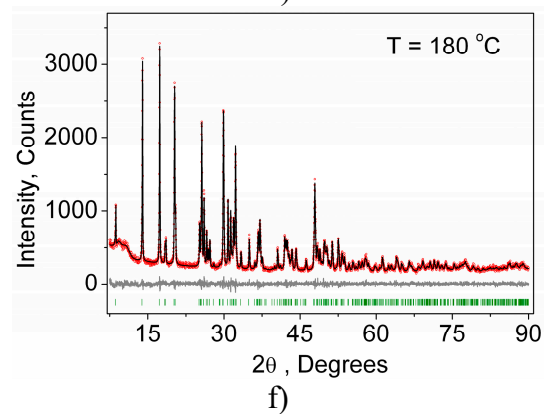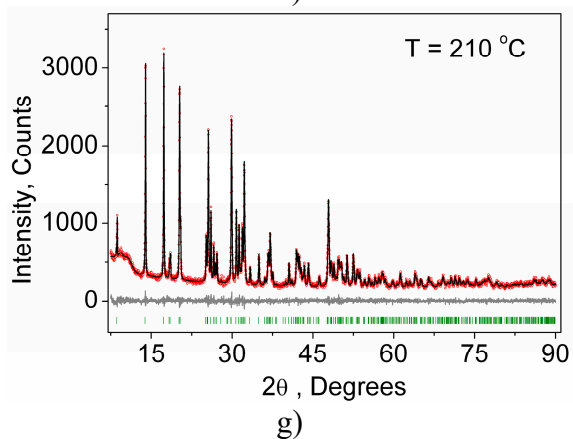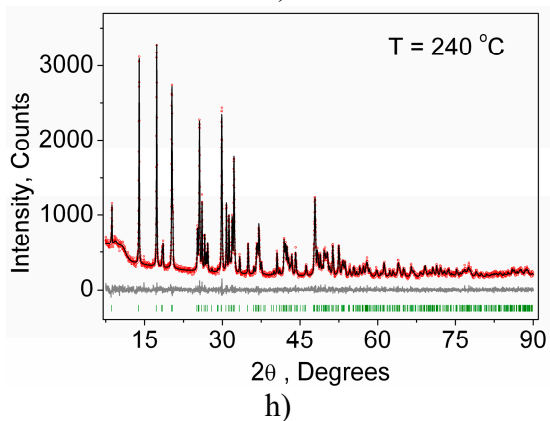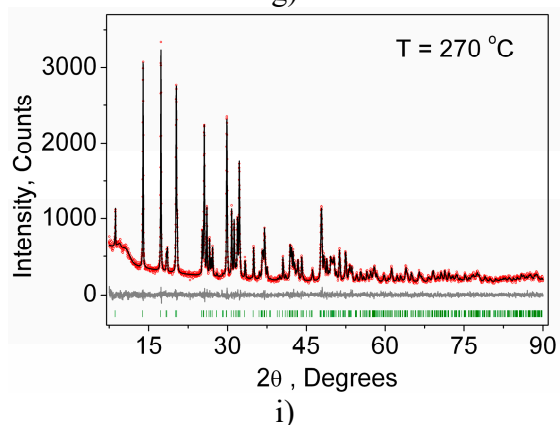

**Figure S3.** Difference Rietveld plots of  $\text{Pr}_2(\text{SO}_4)_3$  at different temperatures: a)  $T = 30\text{ }^\circ\text{C}$ ; b)  $T = 60\text{ }^\circ\text{C}$ ; c)  $T = 90\text{ }^\circ\text{C}$ ; d)  $T = 120\text{ }^\circ\text{C}$ ; e)  $T = 150\text{ }^\circ\text{C}$ ; f)  $T = 180\text{ }^\circ\text{C}$ ; g)  $T = 210\text{ }^\circ\text{C}$ ; h)  $T = 240\text{ }^\circ\text{C}$ ; i)  $T = 270\text{ }^\circ\text{C}$ .



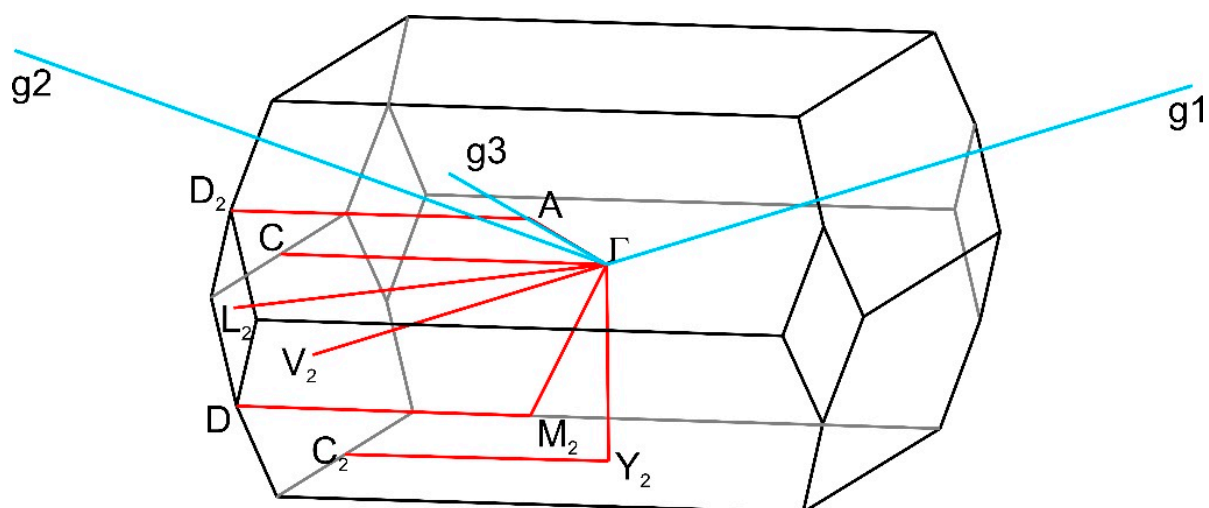

**Figure S4.** Brillouin zone of  $\text{Pr}_2(\text{SO}_4)_3$ .

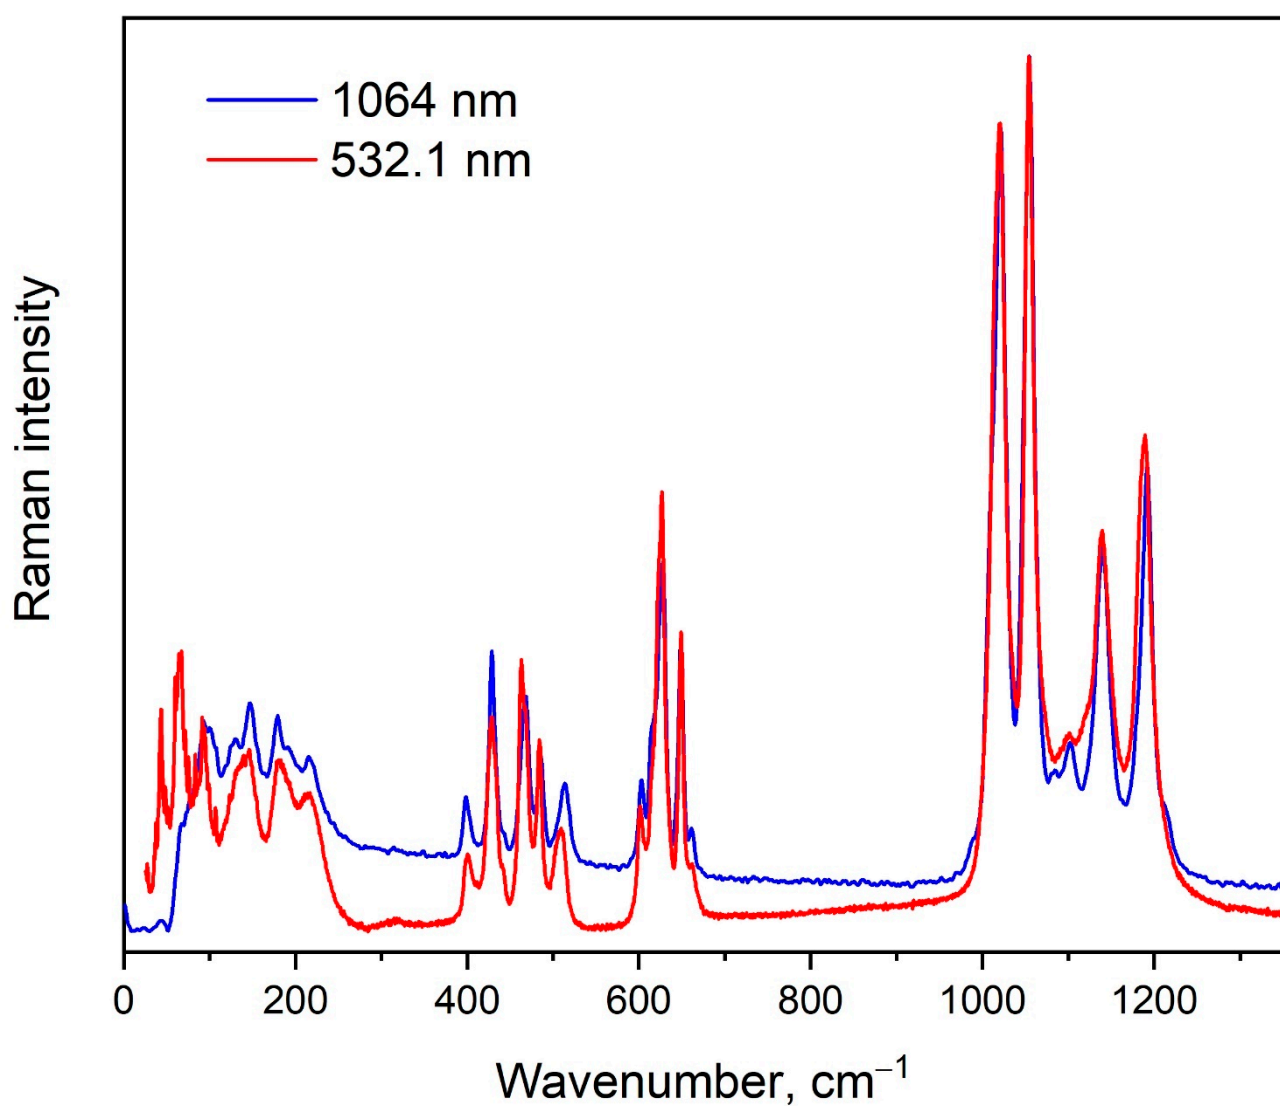

**Figure S5.** Raman spectra for  $\text{Pr}_2(\text{SO}_4)_3$  recorded at 1064 and 532.1 nm excitation wavelengths.

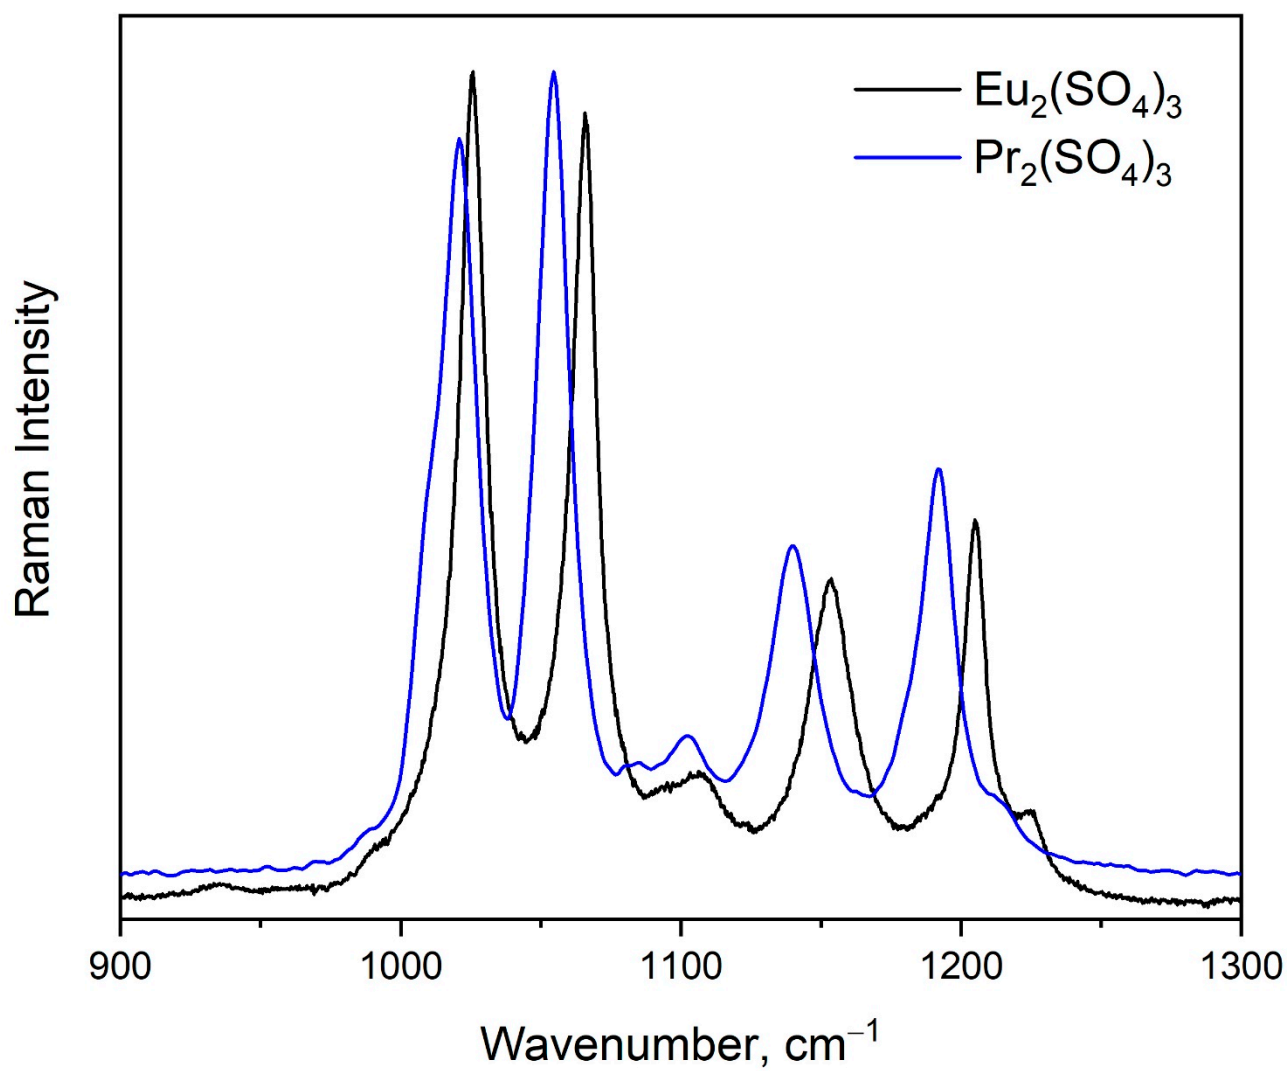

**Figure S6.** Comparison of the high-frequency part of Raman spectra for  $\text{Eu}_2(\text{SO}_4)_3$  and  $\text{Pr}_2(\text{SO}_4)_3$ .

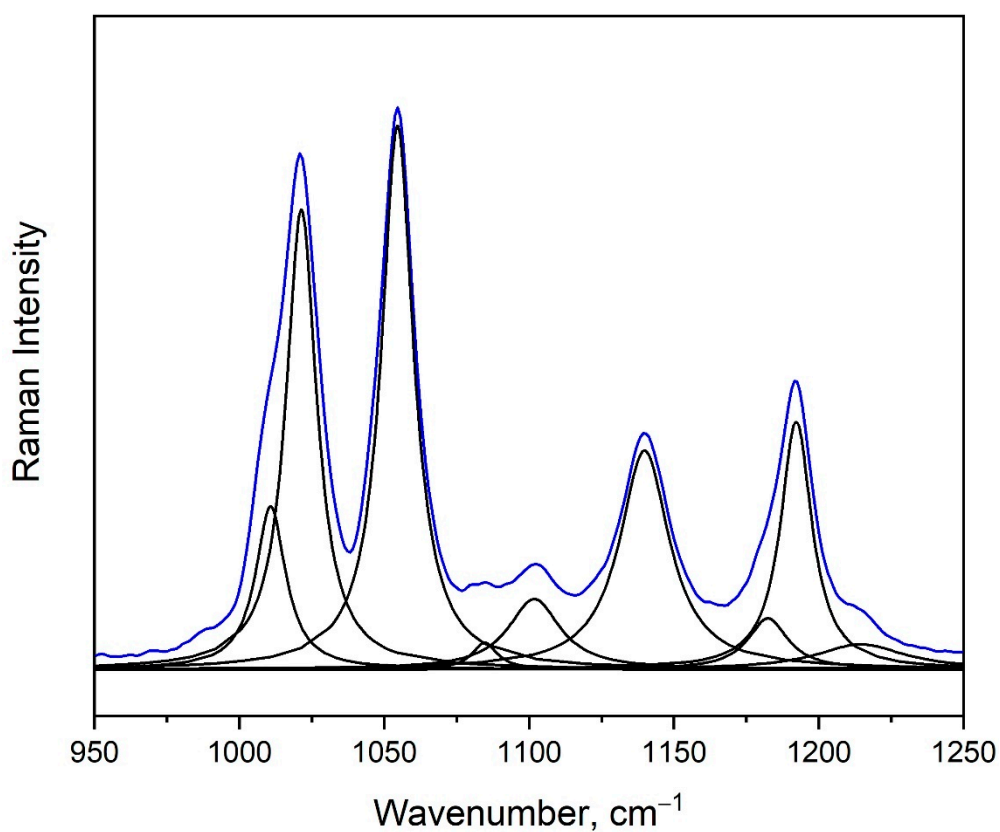

**Figure S7.** Decomposition of the high-frequency part of  $\text{Pr}_2(\text{SO}_4)_3$  Raman spectra.

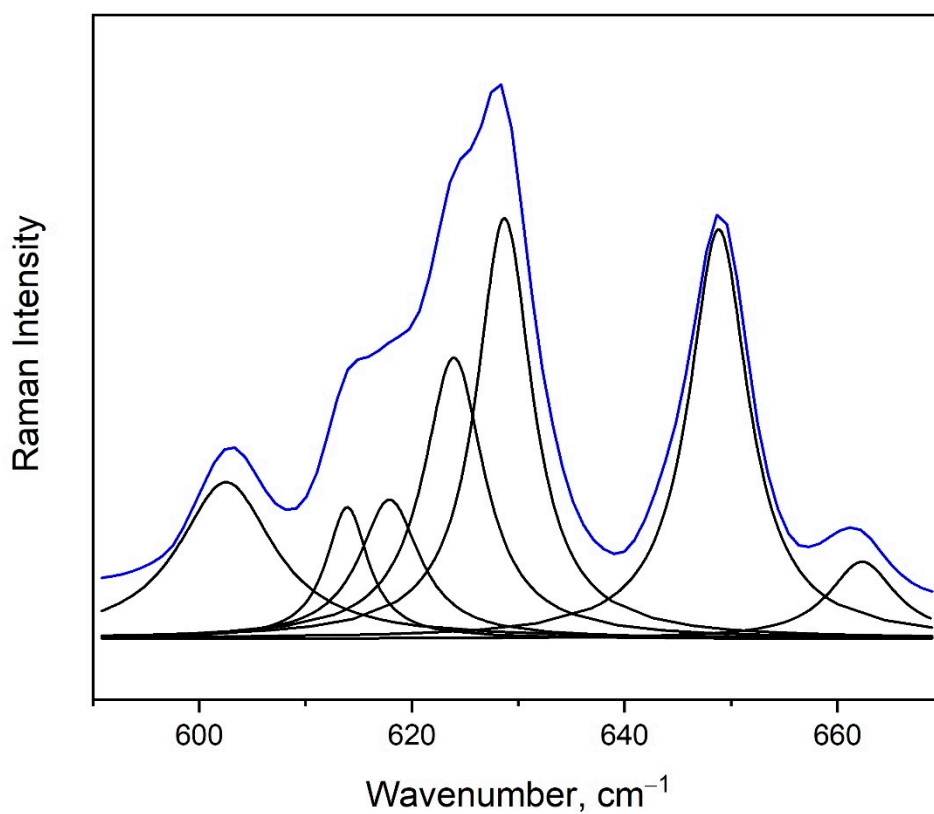

**Figure S8.** Decomposition of Raman spectra of  $\text{Pr}_2(\text{SO}_4)_3$  in the range of  $\nu_4$  vibrations.

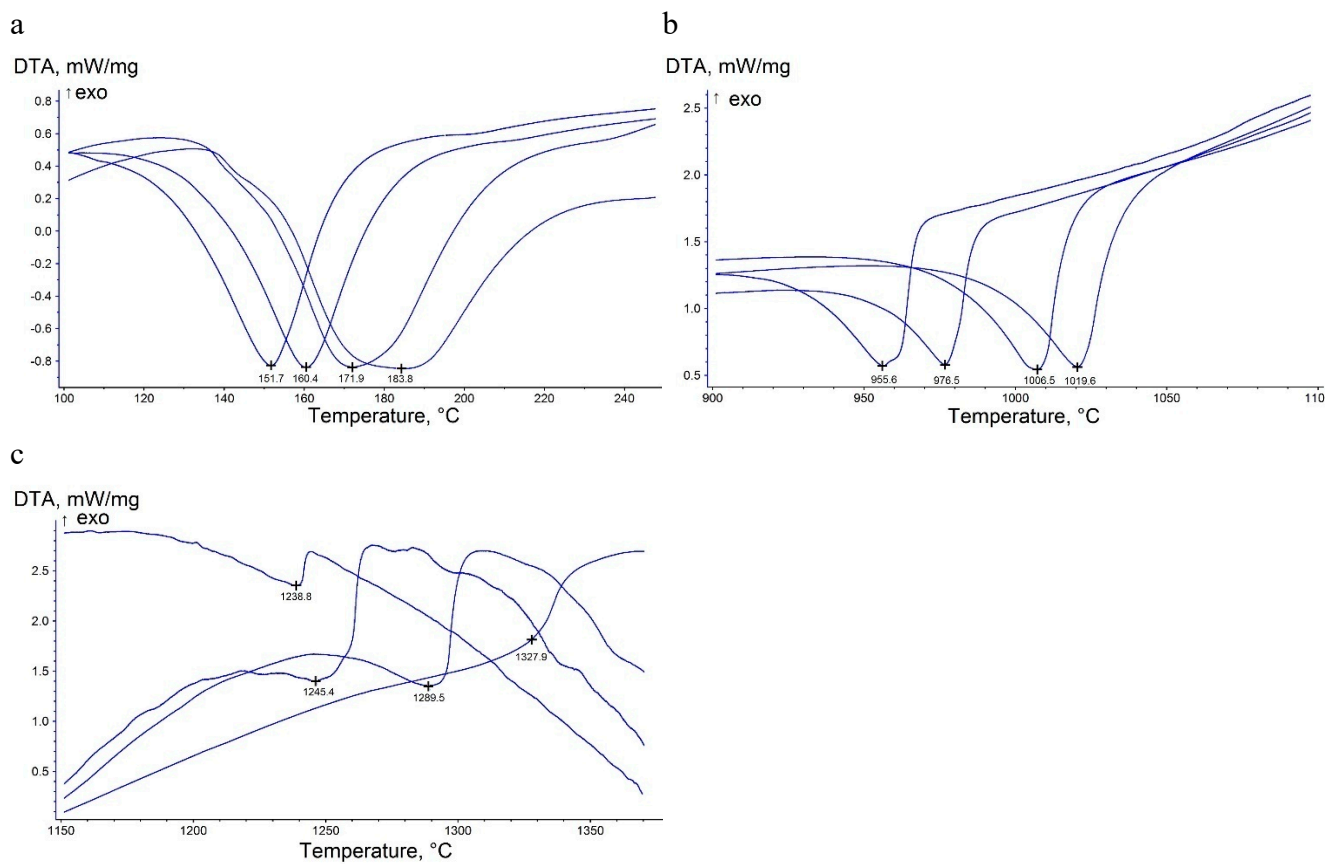

**Figure S9.** Heat effect showing up in dependence of heating rate for processes: (a)  $\text{Pr}_2(\text{SO}_4)_3 \cdot 8\text{H}_2\text{O} \rightarrow \text{Pr}_2(\text{SO}_4)_3 + 8\text{H}_2\text{O}$ ; (b)  $\text{Pr}_2(\text{SO}_4)_3 \rightarrow \text{Pr}_2\text{O}_2\text{SO}_4 + 2\text{SO}_2 + \text{O}_2$ ; (c)  $6 \text{Pr}_2\text{O}_2\text{SO}_4 \rightarrow 2\text{Pr}_6\text{O}_{11} + 6\text{SO}_2 + \text{O}_2$  (heating rate: I- 3 °C/min, II- 5°C/min, III- 10°C/min, IV- 15°C/min).

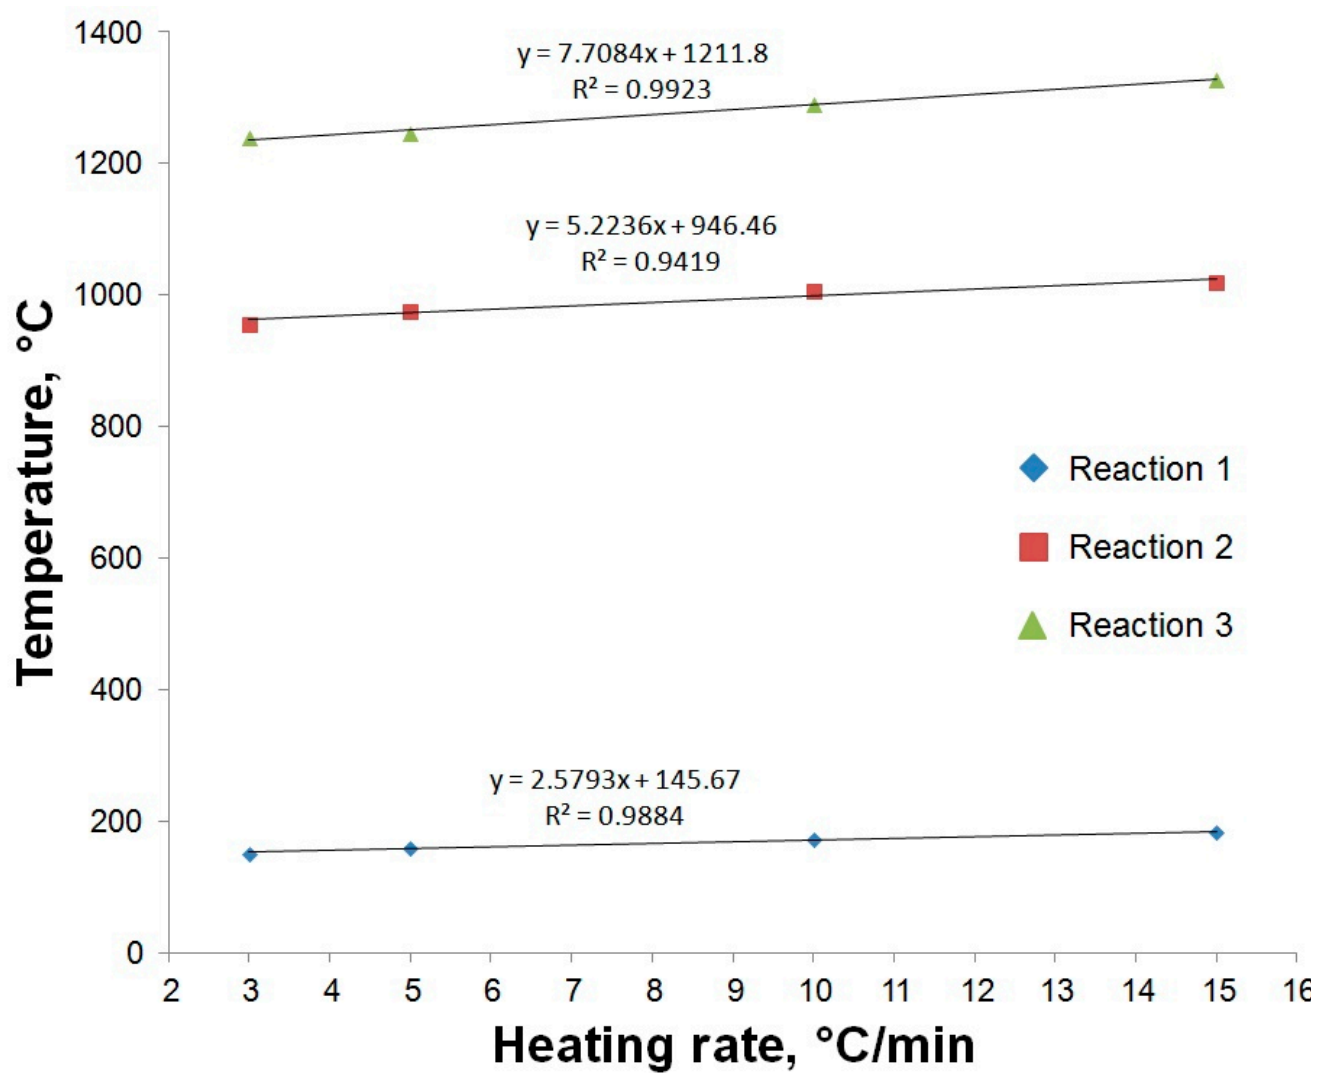

**Figure S10.** Linearity in the manifestation of the maxima of thermal effects depending on the heating rate.
