# Supplementary material for: Exploration of the Crystal Structure and Thermal and Spectroscopic Properties of Monoclinic Praseodymium Sulfate Pr2(SO4)3
Source: Molecules. 2022 Jun 21;27(13):3966. doi: 10.3390/molecules27133966 (PMC9267875; doi:10.3390/molecules27133966)
Supplement: Supplementary file 1 [file molecules-27-03966-s001.zip]

Archive with 5 entries (5 files):
- checkcif_Pr2(SO4)3.pdf
- checkcif_Pr2(SO4)3_8H2O.pdf
- Pr2(SO4)3.cif
- Pr2(SO4)3_8H2O.cif
- Pr2(SO4)3_Support_20.06.22.pdf
