# Supplementary material for: Exploration of the Crystal Structure and Thermal and Spectroscopic Properties of Monoclinic Praseodymium Sulfate Pr2(SO4)3
Source: Molecules. 2022 Jun 21;27(13):3966. doi: 10.3390/molecules27133966 (PMC9267875; doi:10.3390/molecules27133966)
Supplement: Supplementary file 1 [file molecules-27-03966-s001.zip › Pr2(SO4)3.cif]

data_global

_publ_contact_author_name 'Molokeev Maxim'
_publ_contact_author_address
;
Kirensky Institute of Physics of SB RAS 
Akademgorodok 50-38
660036 Krasnoyarsk
Russia 
;
_publ_contact_author_email 'msmolokeev@gmail.com'
_publ_contact_author_fax '+(3912)43-89-23'
_publ_contact_author_phone '+7-950-437-17-72'
_journal_name_full  'Journal of Materiomics'
_publ_section_title              
;
Exploration of the crystal structure, thermal and spectroscopic properties 
of monoclinic praseodymium sulfate Pr2(SO4)3
;
_publ_section_abstract ''

loop_
    _publ_author_name
    _publ_author_address

    'Yu.G. Denisenko'
;
Department of Inorganic and Physical Chemistry, 
Tyumen State University, 
Tyumen 625003, 
Russia
;
    'V.V. Atuchin'
;
Laboratory of Optical Materials and Structures, 
Institute of Semiconductor Physics, SB RAS, 
Novosibirsk 630090, 
Russia
;
    'M.S. Molokeev'
;
Kirensky Institute of Physics of SB RAS 
Akademgorodok 50-38
660036 Krasnoyarsk
Russia 
;
    'A.E. Sedykh'
;
Institute of Inorganic and Analytical Chemistry, 
Justus-Liebig-University Giessen, 
Giessen 35392, 
Germany
;
    'N.A. Kritokhin'
;
Department of Inorganic and Physical Chemistry, 
Tyumen State University, 
Tyumen 625003, 
Russia
;
    'A.S. Aleksandrovsky'
;
Kirensky Institute of Physics of SB RAS 
Akademgorodok 50-38
660036 Krasnoyarsk
Russia 
;
    'A.S. Oreshonkov'
;
Kirensky Institute of Physics of SB RAS 
Akademgorodok 50-38
660036 Krasnoyarsk
Russia 
;
    'N.P. Shestakov'
;
Kirensky Institute of Physics of SB RAS 
Akademgorodok 50-38
660036 Krasnoyarsk
Russia 
;
    'S.V. Adichtchev'
;
Institute of Automation and Electrometry, 
Russian Academy of Sciences, 
Novosibirsk 630090, 
Russia
;
    'A.M. Pugachev'
;
Institute of Automation and Electrometry, 
Russian Academy of Sciences, 
Novosibirsk 630090, 
Russia
;
    'E.I. Salnikova'
;
Department of Inorganic and Physical Chemistry, 
Tyumen State University, 
Tyumen 625003, 
Russia
;
    'O.V. Andreev'
;
Department of Inorganic and Physical Chemistry, 
Tyumen State University, 
Tyumen 625003, 
Russia
;
    'I.A. Razumkova'
;
Department of Inorganic and Physical Chemistry, 
Tyumen State University, 
Tyumen 625003, 
Russia
;
    'K. Muller-Buschbaum'
;
Institute of Inorganic and Analytical Chemistry, 
Justus-Liebig-University Giessen, 
Giessen 35392, 
Germany
;


data_a

_diffrn_radiation_probe  x-ray
_diffrn_measurement_device_type
;
D8 ADVANCE Bruker
;
_pd_spec_mount_mode reflection
_pd_meas_scan_method step
 loop_
_diffrn_radiation_wavelength
_diffrn_radiation_wavelength_wt
 1.5406    1.0000
 1.5443    0.5000
_diffrn_radiation_type
;
 Cu K\a~1~~2~
;
_diffrn_radiation_monochromator none

_chemical_name_mineral
;
;

_symmetry_space_group_name_H-M C2/c

_symmetry_cell_setting monoclinic
_symmetry_space_group_name_hall 
;
-C 2yc
;

_cell_length_a  21.60515(35)
_cell_length_b  6.72367(12)
_cell_length_c  6.97771(11)
_cell_angle_alpha 90
_cell_angle_beta  107.91483(74)
_cell_angle_gamma 90
_cell_volume 964.478(28)
_chemical_formula_moiety
;
O12 Pr2 S3
;
_chemical_formula_sum
;
O12 Pr2 S3
;

_chemical_formula_weight  570.0085
_cell_formula_units_Z 4
_exptl_crystal_density_diffrn  3.925529

_exptl_absorpt_coefficient_mu  82.864

_cell_measurement_temperature  423
_diffrn_ambient_temperature  423


_pd_char_colour
;
colourless
;

_cell_measurement_reflns_used 104
_cell_measurement_theta_min 3.7495834
_cell_measurement_theta_max 70.0015341
_pd_proc_number_of_points 8281.49383
_pd_meas_2theta_range_min 7.4991668
_pd_meas_2theta_range_max 140.003068
_pd_meas_2theta_range_inc 0.016

_pd_proc_ls_profile_function PearsonVII
_pd_proc_ls_pref_orient_corr
;
Anisotropic model of PO. Spherical harmonics 2 ordrer.
 Jarvinen (1993). Application of symmetrized harmonics expansion to correction
of the preferred orientation effect. - J. Appl. Cryst. 26 p525-531.
;

_refine_ls_shift/su_max  0.01000
_refine_ls_R_I_factor 0.69
_pd_proc_ls_prof_wR_factor 2.745
_pd_proc_ls_prof_R_factor 2.162
_pd_proc_ls_prof_wR_expected 2.103
_refine_ls_goodness_of_fit_all 1.305
loop_
_symmetry_equiv_pos_as_xyz
	'x, y, z'
	'-x, -y, -z'
	'-x, y, -z+1/2'
	'-x+1/2, -y+1/2, -z'
	'-x+1/2, y+1/2, -z+1/2'
	'x, -y, z+1/2'
	'x+1/2, -y+1/2, z+1/2'
	'x+1/2, y+1/2, z'
loop_
_atom_site_label
_atom_site_type_symbol
_atom_site_fract_x
_atom_site_fract_y
_atom_site_fract_z
_atom_site_occupancy
_atom_site_B_iso_or_equiv
Pr Pr 0.131706(32) 0.65109(12) 0.12749(11) 1 0.740(53)
S1 S 0.18297(15) 0.18637(43) 0.17634(45) 1 0.597(76)
S2 S 0 0.66209(79) 0.25 1 1.10(11)
O1 O 0.14709(27) -0.00309(83) 0.1270(11) 1 0.510(78)
O2 O 0.15130(29) 0.3167(11) 0.30218(95) 1 0.510(78)
O3 O 0.25226(28) 0.1488(11) 0.28605(80) 1 0.510(78)
O4 O 0.17550(28) 0.3038(12) -0.00826(88) 1 0.510(78)
O5 O 0.05541(29) 0.54097(96) 0.35443(89) 1 0.510(78)
O6 O 0.02288(27) 0.77827(85) 0.11198(79) 1 0.510(78)

loop_
 _geom_bond_atom_site_label_1
 _geom_bond_atom_site_label_2
 _geom_bond_distance
 _geom_bond_site_symmetry_2
Pr O1 2.3490(56) 1_565
Pr O2 2.5303(72)  .
Pr O2 2.4433(60) 6_564
Pr O3 2.3913(44) 5_555
Pr O4 2.4429(59) 6_565
Pr O5 2.4663(59) 6_564
Pr O6 2.4728(44)  .
S1 O1 1.4758(60)  .
S1 O2 1.5417(66)  .
S1 O3 1.4785(53)  .
S1 O4 1.4767(72)  .
S2 O5 1.4459(62)  .
S2 O6 1.4405(58)  .

loop_
 _geom_angle_atom_site_label_1
 _geom_angle_atom_site_label_2
 _geom_angle_atom_site_label_3
 _geom_angle
 _geom_angle_site_symmetry_1
 _geom_angle_site_symmetry_3
O1 Pr O2 151.3(11) 1_565 1_555
O1 Pr O2 81.13(25) 1_565 6_564
O1 Pr O3 82.47(21) 1_565 5_555
O1 Pr O4 82.47(27) 1_565 6_565
O1 Pr O5 125.34(42) 1_565 6_564
O1 Pr O6 77.92(19) 1_565 1_555
O2 Pr O2 118.37(38) 1_555 6_564
O2 Pr O3 82.28(21) 1_555 5_555
O2 Pr O4 69.83(32) 1_555 6_565
O2 Pr O5 83.2(22) 1_555 6_564
O2 Pr O6 110.14(25) 1_555 1_555
O2 Pr O3 76.54(19) 6_564 5_555
O2 Pr O4 146.43(81) 6_564 6_565
O2 Pr O5 66.07(30) 6_564 6_564
O2 Pr O6 111.27(24) 6_564 1_555
O3 Pr O4 72.41(22) 5_555 6_565
O3 Pr O5 126.24(38) 5_555 6_564
O4 Pr O5 145.26(77) 6_565 6_564
O4 Pr O6 93.52(17) 6_565 1_555
O5 Pr O6 75.33(20) 6_564 1_555
O1 S1 O2 109.28(41) 1_555 1_555
O1 S1 O3 110.42(41) 1_555 1_555
O1 S1 O4 110.45(48) 1_555 1_555
O2 S1 O3 111.0(4) 1_555 1_555
O2 S1 O4 104.14(40) 1_555 1_555
O3 S1 O4 111.38(39) 1_555 1_555
O5 S2 O5 111.44(46) 1_555 3_555
O5 S2 O6 103.96(33) 1_555 1_555
O5 S2 O6 111.8(38) 1_555 3_555
O6 S2 O6 114.32(46) 1_555 3_555
