# Supplementary material for: Exploration of the Crystal Structure and Thermal and Spectroscopic Properties of Monoclinic Praseodymium Sulfate Pr2(SO4)3
Source: Molecules. 2022 Jun 21;27(13):3966. doi: 10.3390/molecules27133966 (PMC9267875; doi:10.3390/molecules27133966)
Supplement: Supplementary file 1 [file molecules-27-03966-s001.zip › Pr2(SO4)3_8H2O.cif]

data_global

_publ_contact_author_name 'Molokeev Maxim'
_publ_contact_author_address
;
Kirensky Institute of Physics of SB RAS 
Akademgorodok 50-38
660036 Krasnoyarsk
Russia 
;
_publ_contact_author_email 'msmolokeev@gmail.com'
_publ_contact_author_fax '+(3912)43-89-23'
_publ_contact_author_phone '+7-950-437-17-72'
_journal_name_full  'Journal of Materiomics'
_publ_section_title              
;
Exploration of the crystal structure, thermal and spectroscopic properties 
of monoclinic praseodymium sulfate Pr2(SO4)3
;
_publ_section_abstract ''

loop_
    _publ_author_name
    _publ_author_address

    'Yu.G. Denisenko'
;
Department of Inorganic and Physical Chemistry, 
Tyumen State University, 
Tyumen 625003, 
Russia
;
    'V.V. Atuchin'
;
Laboratory of Optical Materials and Structures, 
Institute of Semiconductor Physics, SB RAS, 
Novosibirsk 630090, 
Russia
;
    'M.S. Molokeev'
;
Kirensky Institute of Physics of SB RAS 
Akademgorodok 50-38
660036 Krasnoyarsk
Russia 
;
    'A.E. Sedykh'
;
Institute of Inorganic and Analytical Chemistry, 
Justus-Liebig-University Giessen, 
Giessen 35392, 
Germany
;
    'N.A. Kritokhin'
;
Department of Inorganic and Physical Chemistry, 
Tyumen State University, 
Tyumen 625003, 
Russia
;
    'A.S. Aleksandrovsky'
;
Kirensky Institute of Physics of SB RAS 
Akademgorodok 50-38
660036 Krasnoyarsk
Russia 
;
    'A.S. Oreshonkov'
;
Kirensky Institute of Physics of SB RAS 
Akademgorodok 50-38
660036 Krasnoyarsk
Russia 
;
    'N.P. Shestakov'
;
Kirensky Institute of Physics of SB RAS 
Akademgorodok 50-38
660036 Krasnoyarsk
Russia 
;
    'S.V. Adichtchev'
;
Institute of Automation and Electrometry, 
Russian Academy of Sciences, 
Novosibirsk 630090, 
Russia
;
    'A.M. Pugachev'
;
Institute of Automation and Electrometry, 
Russian Academy of Sciences, 
Novosibirsk 630090, 
Russia
;
    'E.I. Salnikova'
;
Department of Inorganic and Physical Chemistry, 
Tyumen State University, 
Tyumen 625003, 
Russia
;
    'O.V. Andreev'
;
Department of Inorganic and Physical Chemistry, 
Tyumen State University, 
Tyumen 625003, 
Russia
;
    'I.A. Razumkova'
;
Department of Inorganic and Physical Chemistry, 
Tyumen State University, 
Tyumen 625003, 
Russia
;
    'K. Muller-Buschbaum'
;
Institute of Inorganic and Analytical Chemistry, 
Justus-Liebig-University Giessen, 
Giessen 35392, 
Germany
;

data_a

_diffrn_radiation_probe  x-ray
_diffrn_measurement_device_type
;
D8 ADVANCE Bruker
;
_pd_spec_mount_mode reflection
_pd_meas_scan_method step
 loop_
_diffrn_radiation_wavelength
_diffrn_radiation_wavelength_wt
 1.5406    1.0000
 1.5443    0.5000
_diffrn_radiation_type
;
 Cu K\a~1~~2~
;
_diffrn_radiation_monochromator none

_chemical_name_mineral
;
;

_symmetry_space_group_name_H-M C2/c

_symmetry_cell_setting monoclinic
_symmetry_space_group_name_hall 
;
-C 2yc
;

_cell_length_a  13.70584(22)
_cell_length_b  6.86635(12)
_cell_length_c  18.47023(33)
_cell_angle_alpha 90
_cell_angle_beta  102.8161(13)
_cell_angle_gamma 90
_cell_volume 1694.913(52)
_chemical_formula_moiety
;
H16 O20 Pr2 S3
;
_chemical_formula_sum
;
H16 O20 Pr2 S3
;

_chemical_formula_weight  714.13
_cell_formula_units_Z 4
_exptl_crystal_density_diffrn  2.799

_exptl_absorpt_coefficient_mu  48.003

_cell_measurement_temperature  300
_diffrn_ambient_temperature  300


_pd_char_colour
;
colourless
;

_cell_measurement_reflns_used 104
_cell_measurement_theta_min 3.5
_cell_measurement_theta_max 71.9947927
_pd_proc_number_of_points 8551
_pd_meas_2theta_range_min 7
_pd_meas_2theta_range_max 143.989585
_pd_meas_2theta_range_inc 0.0160203

_pd_proc_ls_profile_function PearsonVII
_pd_proc_ls_pref_orient_corr
;
Anisotropic model of PO. Spherical harmonics 2 ordrer.
 Jarvinen (1993). Application of symmetrized harmonics expansion to correction
of the preferred orientation effect. - J. Appl. Cryst. 26 p525-531.
;

_refine_ls_shift/su_max  0.01000
_refine_ls_R_I_factor 4.69
_pd_proc_ls_prof_wR_factor 7.12
_pd_proc_ls_prof_R_factor 5.33
_pd_proc_ls_prof_wR_expected 2.95
_refine_ls_goodness_of_fit_all 2.41
loop_
_symmetry_equiv_pos_as_xyz
	'-x, -y, -z'
	'-x, y, -z+1/2'
	'-x+1/2, -y+1/2, -z'
	'-x+1/2, y+1/2, -z+1/2'
	'x, -y, z+1/2'
	'x, y, z'
	'x+1/2, -y+1/2, z+1/2'
	'x+1/2, y+1/2, z'
loop_
_atom_site_label
_atom_site_type_symbol
_atom_site_fract_x
_atom_site_fract_y
_atom_site_fract_z
_atom_site_occupancy
_atom_site_B_iso_or_equiv
Pr1 Pr 0.16914(14) 0.47625(31) 0.39378(13) 1 0.00436
O1 O 0.3501(12) 0.5117(33) 0.45743(88) 1 0.0075
O2 O 0.0155(16) 0.6639(27) 0.3590(13) 1 0.014
O3 O 0.0386(15) 0.2614(27) 0.4350(10) 1 0.0083
O4 O 0.2665(10) 0.5073(36) 0.29428(82) 1 0.0123
S1 S 0.21194(55) 0.5258(16) 0.58835(45) 1 0.00457
O5 O 0.1984(14) 0.8209(28) 0.3976(13) 1 0.0077
O6 O 0.1600(13) 0.5208(39) 0.6445(11) 1 0.0097
O7 O 0.1487(13) 0.5925(28) 0.5226(11) 1 0.0076
O8 O 0.2497(14) 0.1689(30) 0.4250(12) 1 0.0103
S2 S 0 0.1809(11) 0.25 1 0.0053
O9 O 0.0849(16) 0.3154(29) 0.2924(12) 1 0.0106
O10 O -0.0370(11) 0.0369(32) 0.31163(91) 1 0.0089
H1 H 0.3814 0.4312 0.4838 1 0.009
H2 H 0.361 0.6166 0.4845 1 0.009
H3 H -0.0434 0.6132 0.3549 1 0.017
H4 H 0.0076 0.7843 0.3477 1 0.017
H5 H 0.0064 0.1908 0.4028 1 0.01
H6 H -0.0066 0.3184 0.4527 1 0.01
H7 H 0.2369 0.4741 0.2524 1 0.015
H8 H 0.3197 0.5429 0.3007 1 0.015

loop_
 _geom_bond_atom_site_label_1
 _geom_bond_atom_site_label_2
 _geom_bond_distance
 _geom_bond_site_symmetry_2
Pr1 O1 2.509(13) 6_555
Pr1 O2 2.430(17) 6_555
Pr1 O3 2.561(17) 6_555
Pr1 O4 2.508(13) 6_555
Pr1 O5 2.398(19) 6_555
Pr1 O7 2.583(19) 6_555
Pr1 O8 3.432(21) 3_556
Pr1 O8 2.392(19) 6_555
Pr1 O9 2.258(20) 6_555
S1 O5 1.594(18) 3_566
S1 O6 1.382(18) 6_555
S1 O7 1.403(20) 6_555
S1 O8 1.477(22) 3_556
S2 O9 1.554(19) 2_555
S2 O10 1.669(18) 2_555


loop_
 _geom_angle_atom_site_label_1
 _geom_angle_atom_site_label_2
 _geom_angle_atom_site_label_3
 _geom_angle
 _geom_angle_site_symmetry_1
 _geom_angle_site_symmetry_3
O1 Pr1 O2 141.31(92) . 6_555
O1 Pr1 O3 126.83(58) . 6_555
O1 Pr1 O4 72.77(28) . 6_555
O1 Pr1 O5 75.47(38) . 6_555
O1 Pr1 O7 80.58(28) . 6_555
O1 Pr1 O8 59.90(50) . 3_556
O1 Pr1 O8 67.50(44) . 6_555
O1 Pr1 O9 134.92(83) . 6_555
O1 S1 O1 89.86(25) . 3_566
O1 S1 O5 66.57(54) . 3_566
O1 S1 O7 74.17(48) . 6_555
O1 S1 O8 65.09(60) . 3_556
O2 Pr1 O1 141.31(92) . 6_555
O2 Pr1 O3 76.26(34) . 6_555
O2 Pr1 O4 109.38(39) . 6_555
O2 Pr1 O5 67.30(45) . 6_555
O2 Pr1 O7 79.33(35) . 6_555
O2 Pr1 O8 119.08(57) . 3_556
O2 Pr1 O8 149.0(14) . 6_555
O2 Pr1 O9 77.67(39) . 6_555
O3 Pr1 O1 126.83(58) . 6_555
O3 Pr1 O2 76.26(34) . 6_555
O3 Pr1 O4 141.89(91) . 6_555
O3 Pr1 O5 133.05(80) . 6_555
O3 Pr1 O7 71.25(38) . 6_555
O3 Pr1 O8 68.87(41) . 3_556
O3 Pr1 O8 74.67(37) . 6_555
O3 Pr1 O9 72.68(41) . 6_555
O3 S2 O9 110.08(54) . 2_555
O3 S2 O9 57.48(71) . 6_555
O3 S2 O10 141.4(11) . 2_555
O3 S2 O10 53.94(67) . 6_555
O4 Pr1 O1 72.77(28) . 6_555
O4 Pr1 O2 109.38(39) . 6_555
O4 Pr1 O3 141.89(91) . 6_555
O4 Pr1 O5 79.92(39) . 6_555
O4 Pr1 O7 146.3(11) . 6_555
O4 Pr1 O8 128.98(66) . 3_556
O4 Pr1 O8 87.67(34) . 6_555
O4 Pr1 O9 72.01(41) . 6_555
O5 Pr1 O1 75.47(38) . 6_555
O5 Pr1 O2 67.30(45) . 6_555
O5 Pr1 O3 133.05(80) . 6_555
O5 Pr1 O4 79.92(39) . 6_555
O5 Pr1 O7 73.71(42) . 6_555
O5 Pr1 O8 103.99(39) . 3_556
O5 Pr1 O8 142.9(12) . 6_555
O5 Pr1 O9 123.93(70) . 6_555
O6 S1 O1 93.94(60) . 3_566
O6 S1 O5 113.62(72) . 3_566
O6 S1 O7 109.59(65) . 6_555
O6 S1 O8 111.36(79) . 3_556
O7 Pr1 O1 80.58(28) . 6_555
O7 Pr1 O2 79.33(35) . 6_555
O7 Pr1 O3 71.25(38) . 6_555
O7 Pr1 O4 146.3(11) . 6_555
O7 Pr1 O5 73.71(42) . 6_555
O7 Pr1 O8 100.90(36) . 6_555
O7 Pr1 O9 140.7(11) . 6_555
O7 S1 O1 52.99(92) . 3_566
O7 S1 O1 74.17(48) . 6_555
O7 S1 O5 103.36(61) . 3_566
O7 S1 O6 109.59(65) . 6_555
O7 S1 O8 108.98(69) . 3_556
O8 Pr1 O1 67.50(44) . 6_555
O8 Pr1 O2 149.0(14) . 6_555
O8 Pr1 O3 74.67(37) . 6_555
O8 Pr1 O4 87.67(34) . 6_555
O8 Pr1 O5 142.9(12) . 6_555
O8 Pr1 O7 100.90(36) . 6_555
O8 Pr1 O8 58.42(63) . 3_556
O8 Pr1 O9 83.80(37) . 6_555
O9 Pr1 O1 134.92(83) . 6_555
O9 Pr1 O2 77.67(39) . 6_555
O9 Pr1 O3 72.68(41) . 6_555
O9 Pr1 O4 72.01(41) . 6_555
O9 Pr1 O5 123.93(70) . 6_555
O9 Pr1 O7 140.7(11) . 6_555
O9 Pr1 O8 131.45(87) . 3_556
O9 Pr1 O8 83.80(37) . 6_555
O9 S2 O3 110.08(54) . 2_555
O9 S2 O3 57.48(71) . 6_555
O9 S2 O9 107.09(60) . 2_555
O9 S2 O10 112.87(61) . 2_555
O9 S2 O10 108.36(56) . 6_555
O10 S2 O3 141.4(11) . 2_555
O10 S2 O3 53.94(67) . 6_555
O10 S2 O9 112.87(61) . 2_555
O10 S2 O9 108.36(56) . 6_555
O10 S2 O10 107.35(53) . 2_555
